# Supplementary material
Source: PubMed Central journal article supplement (PMC2758106)
Supplement: NIHMS146155-supplement-Supp_Tables.pdf [file NIHMS146155-supplement-Supp_Tables.pdf]

**Table S1: Association rates for  $E\sigma^{70}$  variants from Figure 4**

| $E\sigma^{70}$ | 6S RNA     |                                                         | P <sub>-35-10</sub> DNA |                                                         |
|----------------|------------|---------------------------------------------------------|-------------------------|---------------------------------------------------------|
|                | $y_{\max}$ | $k_{\text{obs}}^*$<br>( $\text{sec}^{-1} \times 10^3$ ) | $y_{\max}$              | $k_{\text{obs}}^*$<br>( $\text{sec}^{-1} \times 10^3$ ) |
| wild type      | 0.82       | 30.5                                                    | 0.77                    | 5.5                                                     |
| R554A          | 0.53       | 1.5                                                     | 0.73                    | 2.9                                                     |
| R562A          | 0.68       | 4.0                                                     | 0.62                    | 2.3                                                     |
| L573A          | 0.75       | 5.8                                                     | 0.42                    | 1.6                                                     |
| E574A          | 0.86       | 212.0                                                   | 0.76                    | 4.3                                                     |
| R584A          | 0.16       | 0.3                                                     | 0.64                    | 1.6                                                     |
| E585A          | 0.86       | 210.3                                                   | 0.64                    | 1.9                                                     |
| R586A          | 0.46       | 0.9                                                     | 0.65                    | 2.9                                                     |
| R588A          | 0.18       | 0.2                                                     | 0.09                    | 0.3                                                     |

**Table S2: Association rates for  $E\sigma^{70}$  variants from Figure 5**

| $E\sigma^{70}$ | 6S RNA     |                                                         | P <sub>-35-10</sub> DNA |                                                         |
|----------------|------------|---------------------------------------------------------|-------------------------|---------------------------------------------------------|
|                | $y_{\max}$ | $k_{\text{obs}}^*$<br>( $\text{sec}^{-1} \times 10^3$ ) | $y_{\max}$              | $k_{\text{obs}}^*$<br>( $\text{sec}^{-1} \times 10^3$ ) |
| wild type      | 0.82       | 30.5                                                    | 0.77                    | 5.5                                                     |
| K593A          | 0.52       | 1.0                                                     | 0.76                    | 6.5                                                     |
| L595A          | 0.65       | 4.4                                                     | 0.57                    | 2.8                                                     |
| R596A          | 0.44       | 0.7                                                     | 0.77                    | 6.4                                                     |
| K597A          | 0.23       | 0.5                                                     | 0.75                    | 6.0                                                     |
| L598A          | 0.75       | 10.2                                                    | 0.73                    | 4.3                                                     |
| R599A          | 0.65       | 2.4                                                     | 0.75                    | 5.9                                                     |
| H600A          | 0.80       | 21.4                                                    | 0.76                    | 6.8                                                     |

**Table S3: Association rates for  $E\sigma^{70}$  variants from Figure 7**

| $E\sigma^{70}$ | 6S RNA     |                                                         |
|----------------|------------|---------------------------------------------------------|
|                | $y_{\max}$ | $k_{\text{obs}}^*$<br>( $\text{sec}^{-1} \times 10^3$ ) |
| wild type      | 0.79       | 6.3                                                     |
| E574A          | 0.86       | 90.9                                                    |
| D581G          | 0.79       | 12.5                                                    |
| E585A          | 0.87       | 116.1                                                   |
| E591A          | 0.85       | 67.3                                                    |
| A592K          | 0.86       | 111.1                                                   |

**Legend for Supporting Material:**  $y_{\max}$  and the pseudo first-order rate constants ( $k_{\text{obs}}$ ) were determined from plots of the average fraction of 6S RNA or promoter

DNA (P<sub>-35-10</sub>) bound to E $\sigma$ <sup>70</sup> over time and the equation  $y = y_{\max}(1 - e^{-k_{\text{obs}}t})$  where  $y_{\max}$  is the maximal level of complex formation (see Experimental methods).  $k_{\text{obs}}^*$  is the  $k_{\text{obs}}$  corrected for changes in  $y_{\max}$  for each protein as described by Saecker et al, 2002 and are reported as  $10^3\text{sec}^{-1}$ . Averages were generated from at least 3 independent experiments and standard error associated with these measurements can be seen in Figures 4, 5 and 7. Standard error associated with how well the data fit to the equation was generally < 5% of  $y_{\max}$  or  $k_{\text{obs}}$ , except when values were very low, such as for R588A. Note that RNA binding was done at 18°C for Table S1 and S2 and 9°C for Table S3, DNA binding was at 30°C, and for all binding 2.2 nM E $\sigma$ <sup>70</sup>(active) and 0.5 nM nucleic acid was used. Rate constants can only be compared for binding done under the same conditions; thus it is not possible to directly compare the rate of RNA and DNA binding here.
